# Supplementary material for: High yield production of C2–C3 olefins and para-xylene from methanol using a SiO2-coated FeOx/ZSM-5 catalyst
Source: Royal Society of Chemistry journal article supplement (doi:10.1039/c7ra04111j), 2017-01-01
Supplement: c7ra04111j1.pdf [file c7ra04111j1.pdf]

## Supporting information

### High yield production of C<sub>2</sub>-C<sub>3</sub> olefins and *para*-xylene from methanol using a SiO<sub>2</sub>-coated FeOx/ZSM-5 catalyst

Qiongfang Hu<sup>1</sup>, Xiaofan Huang<sup>2</sup>, Yu Cui<sup>1,2</sup>, Tengfa Luo<sup>3</sup>, Xiaoping Tang<sup>1,2</sup>, Tong Wang<sup>1,2,3</sup>, Weizhong Qian<sup>1\*</sup>, Fei Wei<sup>1</sup>

1. Department of Chemical Engineering, Tsinghua University, 100084, China. \*Email: qianwz@tsinghua.edu.cn.

2. Coal Chemical Industry Division, Huadian Coal Industry Group Co. Ltd., Beijing 100031, China

3. Shanxi Yuheng chemical Co., Huadian coal Industry Group Co. Ltd., Yulin, 719000, Shanxi, China

#### SI-1 Characterization of the external surface

2,6-di-tert-butylpyridine (DTBP) was used as probe molecules, which only adsorbed on external surface of the catalyst, but was unable to enter pores of zeolite. Firstly, certain sample of catalyst (W<sub>s</sub>) was put into the instrument of thermogravimetric analysis (TGA, TG2050A) and was elevated from ambient temperature to 500 °C in N<sub>2</sub>. The step was to remove water and gases impurities physically adsorbed on the zeolite. Secondly, the temperature was decreased to 150 °C and allowed the adsorption of 2,6-di-tert-butylpyridine for 30 min. Mass after this step was denoted as W<sub>0</sub>. Thirdly, temperature was elevated to 250 °C for purging with N<sub>2</sub> for 3 hrs. Molecules physically adsorbed were desorbed and the mass was denoted as W<sub>1</sub>. Fourth, the temperature was elevated to 500 °C to remove all molecules chemically adsorbed. The mass was denoted as W<sub>2</sub>. Density of external acids can be calculated as:

$$(W_1 - W_2) / W_s / M_{\text{DTBP}}$$

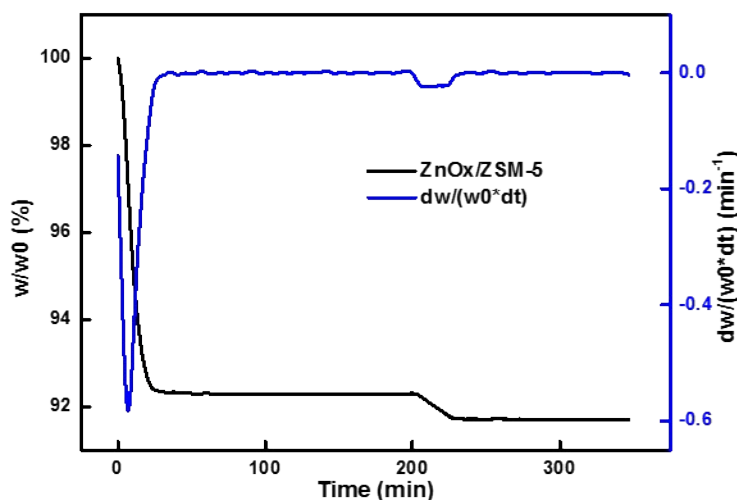

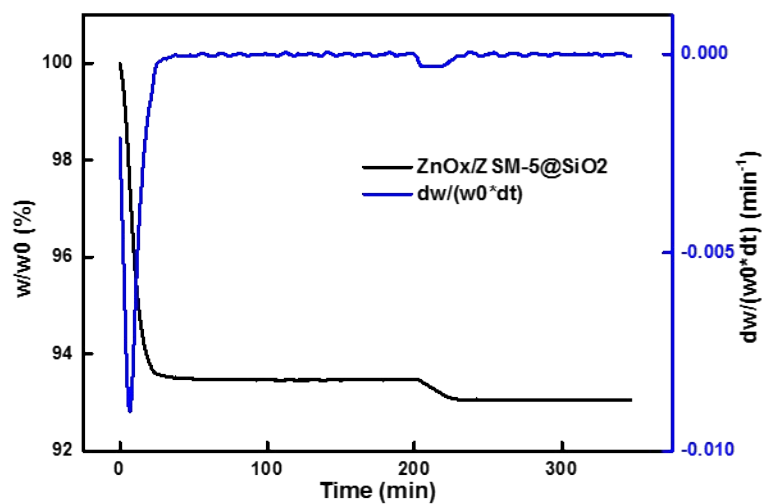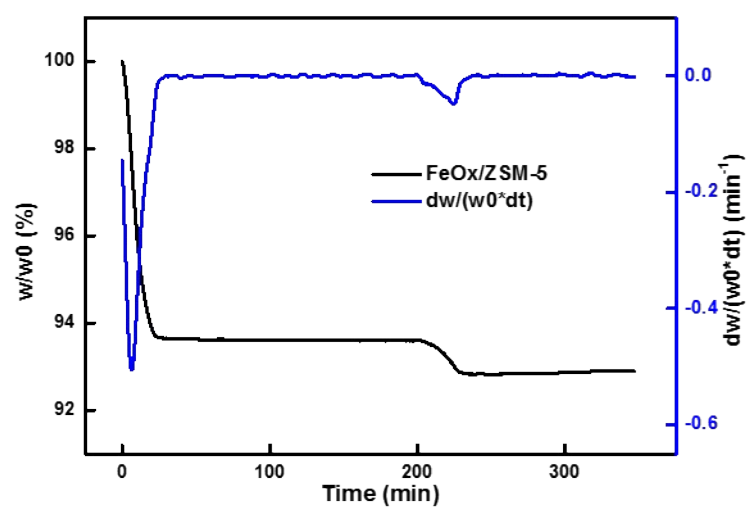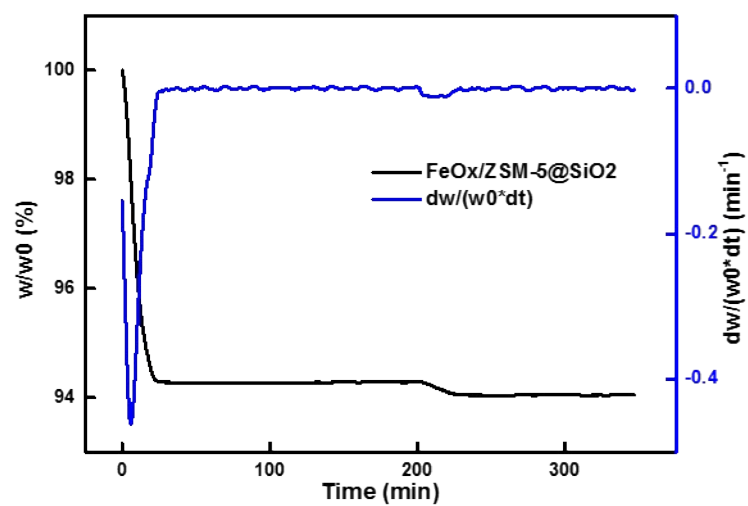

Fig.S1 TG curve to determine the acidic amount inside pores and on the external surface with different catalysts.

SI-2 TEM of ZnOx/ZSM-5 and FeOx/ZSM-5

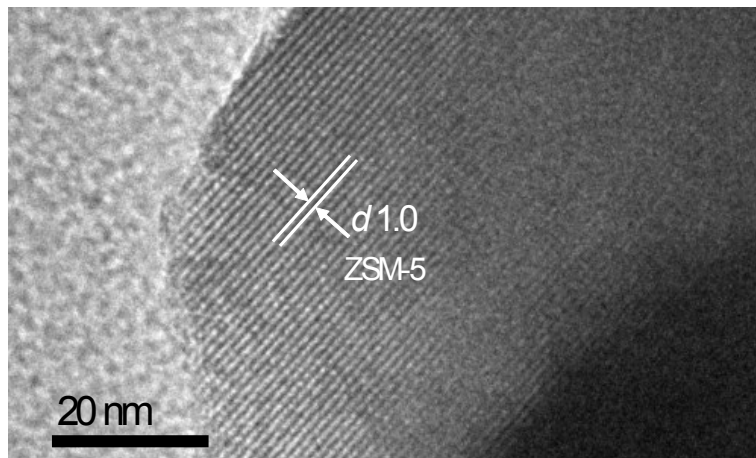

Fig S2 TEM of ZnOx/ZSM-5

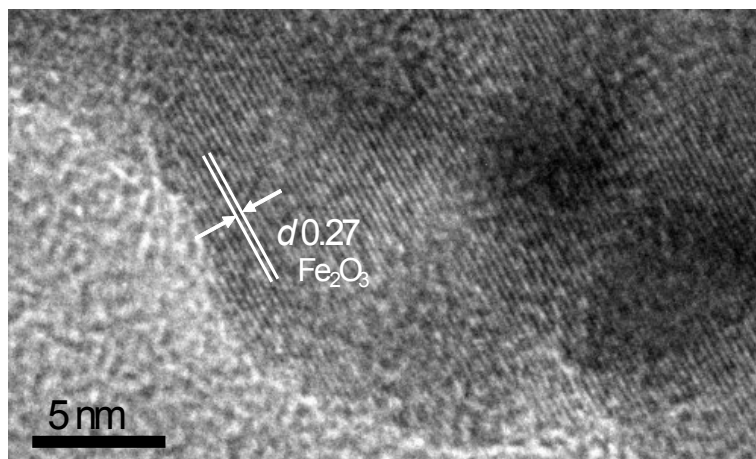

Fig S3 TEM of FeOx/ZSM-5

## SI-3TPR of FeO<sub>x</sub>/ZSM-5

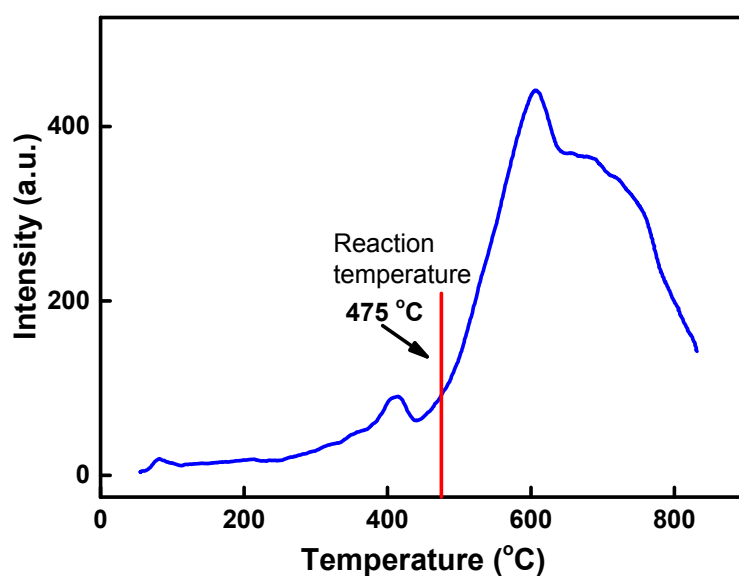

Fig S4 TPR of FeO<sub>x</sub>/ZSM-5

## SI-4 NH<sub>3</sub>-TPD information of catalysts

Table S1. Peak fitting of NH<sub>3</sub>-TPD curve to determine the ratio of weak, strong, medium strong acids.

| Catalyst                | Total area | Parameter            | Acid Strength |                     |              |       |
|-------------------------|------------|----------------------|---------------|---------------------|--------------|-------|
|                         |            |                      | Weak acids    | Medium strong acids | Strong acids |       |
| HZSM-5                  | 19568      | Peak temperature, °C | 227.3         |                     | 315.6        | 542.9 |
|                         |            | Area (a.u.)          | 4943          |                     | 11864        | 2761  |
|                         |            | Percentage, %        | 25.3          |                     | 60.6         | 14.1  |
| FeO <sub>x</sub> /ZSM-5 | 14519      | Peak temperature, °C | 224.7         | 259.6               | 328.9        |       |
|                         |            | Area (a.u.)          | 1313          | 5336                | 7870         |       |
|                         |            | Percentage, %        | 9.0           | 36.8                | 54.2         |       |
| ZnO <sub>x</sub> /ZSM-5 | 16161      | Peak temperature, °C | 221.4         | 266.2               | 342.7        |       |
|                         |            | Area (a.u.)          | 1788          | 4289                | 10084        |       |
|                         |            | Percentage, %        | 11.1          | 26.5                | 62.4         |       |

## SI-5 Comparison of the four modified ZSM-5 and H-ZSM-5

Table S2. Acidity, effect of SiO<sub>2</sub> on the external acidity, specific surface area and pore volume of different catalysts.

| □                         | Acid density(mmol/g) |          |       | Effect of SiO <sub>2</sub> coat on external acidity | External acid/ Total acid | Specific surface area(m <sup>2</sup> /g) | Acid density (umol/m <sup>2</sup> ) | Pore volume(mL/g) |
|---------------------------|----------------------|----------|-------|-----------------------------------------------------|---------------------------|------------------------------------------|-------------------------------------|-------------------|
|                           | Total                | External | Inner |                                                     |                           |                                          |                                     |                   |
| H-ZSM-5                   | 1.246                | 0.272    | 0.974 |                                                     | 21.83%                    | 402                                      | 3.096                               | 0.246             |
| Zn/ZSM-5                  | 1.029                | 0.034    | 0.995 | -29%                                                | 3.27%                     | 360                                      | 2.858                               | 0.166             |
| Zn/ZSM-5@SiO <sub>2</sub> | 0.983                | 0.024    | 0.959 |                                                     | 2.44%                     | 318                                      | 3.091                               | 0.153             |
| Fe/ZSM-5                  | 0.752                | 0.044    | 0.708 | -70%                                                | 5.85%                     | 345                                      | 2.179                               | 0.163             |
| Fe/ZSM-5@SiO <sub>2</sub> | 0.737                | 0.013    | 0.724 |                                                     | 1.81%                     | 331                                      | 2.227                               | 0.155             |
